# Supplementary material for: Association of potential salivary biomarkers with diabetic retinopathy and its severity in type-2 diabetes mellitus: a proteomic analysis by mass spectrometry
Source: PeerJ. 2016 May 12;4:e2022. doi: 10.7717/peerj.2022 (PMC4893325; doi:10.7717/peerj.2022)
Supplement: Supplemental Information 1 [file peerj-04-2022-s001.xlsx]

## Sheet: Sheet1
Accession	Description	ΣCoverage	Σ# Proteins	Σ# Unique Peptides	Σ# Peptides	Σ# PSMs	A5: 114/113	A5: 114/113 Count	A5: 114/113 Variability [%]	B5: 114/113	B5: 114/113 Count	B5: 114/113 Variability [%]	C5: 114/113	C5: 114/113 Count	C5: 114/113 Variability [%]	A5: 115/113	A5: 115/113 Count	A5: 115/113 Variability [%]	B5: 115/113	B5: 115/113 Count	B5: 115/113 Variability [%]	C5: 115/113	C5: 115/113 Count	C5: 115/113 Variability [%]	A5: 115/114	A5: 115/114 Count	A5: 115/114 Variability [%]	B5: 115/114	B5: 115/114 Count	B5: 115/114 Variability [%]	C5: 115/114	C5: 115/114 Count	C5: 115/114 Variability [%]	Score A3	Coverage A3	# Peptides A3	# PSM A3	Score B3	Coverage B3	# Peptides B3	# PSM B3	Score C3	Coverage C3	# Peptides C3	# PSM C3	# AAs	MW [kDa]	calc. pI
301172750	mucin-5B precursor [Homo sapiens]	28.17	6	39	91	311	0.357201	15	86.8229	0.233354	10	71.5691	0.259677	12	94.233	32.0491	36	93.4518	24.3289	22	94.9188	28.4169	24	65.1249	39.0796	7	24.3966	69.7759	6	23.6408	67.1477	9	29.2648	98.0757	21.49	60	109	81.2186	17.53	54	105	50.4825	16.37	52	97	5762	595.96	6.63916
4502027	serum albumin preproprotein [Homo sapiens]	72.09	1	38	47	229	0.346845	16	87.5357	0.229841	10	95.4815	0.198165	14	56.4961	29.9584	23	57.5356	37.4212	14	66.5373	28.0751	18	88.908	50.1071	6	16.5009	42.1713	6	86.53	85.3507	5	11.6987	52.9256	61.25	34	74	33.7094	61.9	34	83	31.1026	67.49	38	72	609	69.3215	6.27783
31377806	polymeric immunoglobulin receptor precursor [Homo sapiens]	64.66	1	24	41	256	0.220145	15	96.6805	0.383304	12	75.7275	0.430332	12	122.043	25.7156	32	158.835	31.873	20	160.458	39.4631	15	107.519	55.0439	6	27.8977	42.4035	4	73.6793	64.4383	4	41.431	65.2556	52.62	27	90	64.5054	49.74	28	93	51.0975	38.48	23	73	764	83.2317	5.74463
148539844	deleted in malignant brain tumors 1 protein isoform c precursor [Homo sapiens]	42.57	3	17	43	118	0.101277	8	51.0306	0.292836	7	39.7031	0.146196	7	78.1589	30.926	14	90.36	19.9337	10	77.8814	18.9145	11	93.13	72.3676	3	0.83748	55.0497	6	46.3864	40.2832	4	91.3678	16.327	35.12	28	46	14.3362	33.37	26	41	10.2366	32.96	22	31	2403	259.547	5.42725
4502337	zinc-alpha-2-glycoprotein precursor [Homo sapiens]	53.36	1	15	18	100	0.353518	10	28.7379	0.475062	10	328.761	0.254924	9	109.077	28.966	17	94.151	24.9456	13	41.6828	29.4141	10	32.7503	48.7098	7	73.1083	27.8801	5	131.552	31.3545	5	202.885	60.2432	36.91	11	34	67.2825	48.99	13	35	44.3643	45.97	13	31	298	34.2371	6.04932
54607120	lactotransferrin isoform 1 precursor [Homo sapiens]	50.85	2	14	29	77	0.215982	8	216.488				0.181893	3	778.873	40.1747	14	39.4476	29.1317	3	18.1245	25.2828	5	46.722	91.1783	4	3.92437							9.01258	37.61	21	33	3.59609	33.1	18	25	6.65653	29.44	15	19	710	78.1319	8.11865
40549418	lactoperoxidase isoform 1 preproprotein [Homo sapiens]	63.06	2	14	38	97	0.459999	3	62.892	0.709683	2	36.517				37.6098	5	96.9087	19.4958	3	94.0951	39.1657	3	64.3827	80.556	2	2.20076	30.2994	2	208.693				9.64299	41.57	20	31	13.2338	45.51	25	37	7.71179	36.38	22	29	712	80.2369	8.6167
4557871	serotransferrin precursor [Homo sapiens]	31.09	1	12	18	58	0.102115	2	0.491628	0.119056	2	93.8257	0.1787	2	137.367	27.6367	4	107.465	23.0502	3	305.137	33.2688	6	31.8871	42.6002	1		7.80244	1		96.5091	1		3.01968	16.05	10	17	6.97842	20.2	11	20	6.12001	24.21	12	21	698	76.9996	7.12256
167614506	plastin-2 [Homo sapiens]	40.19	4	9	23	48	0.258187	3	51.7838	0.158628	1					22.0462	3	3.11513	32.8785	9	31.7818	18.0371	3	206.875	71.6886	2	23.1131							6.04727	24.88	13	17	0	31.58	16	20	3.65002	15.15	9	11	627	70.2439	5.42725
40807482	BPI fold-containing family B member 1 precursor [Homo sapiens]	39.67	1	9	14	28	0.486594	3	69.5478	0.0900547	1					38.1923	4	85.211	32.916	2	55.4127	6.18376	1		62.3658	1								4.71214	23.55	8	9	2.48981	32.23	10	11	3.96241	22.73	7	8	484	52.4085	7.2251
74271845	alpha-2-macroglobulin-like protein 1 precursor [Homo sapiens]	23.45	1	9	26	47	0.567908	1		0.113106	2	138.222	0.276693	1		42.5667	3	39.8403	45.6609	3	26.098	44.6993	1		74.9536	1								2.53768	18.16	17	19	0	11.21	11	13	0	6.74	10	15	1454	161.037	5.74463
167466173	heat shock 70 kDa protein 1A/1B [Homo sapiens]	35.1	3	9	17	37	0.504308	4	15.6071	0.0907116	2	17.9357	0.406525	3	85.4004	15.9532	6	61.5008	17.7432	3	57.2559	70.4436	5	19.1902	18.6286	1		46.4047	1		88.3074	1		9.7266	15.13	8	12	3.39009	18.25	9	10	11.4226	26.99	12	15	641	70.009	5.65576
331999954	keratin, type II cytoskeletal 4 [Homo sapiens]	40.19	2	9	23	69	0.378655	2	116.293	0.142275	2	364.354	0.400933	6	75.9346	35.5825	3	47.7105	42.0609	6	91.8848	26.6184	6	49.0193	68.3472	1					35.5564	3	20.5952	6.56935	26.92	12	17	6.01933	27.12	15	28	7.58823	25.19	13	24	520	56.1093	6.60986
40068518	6-phosphogluconate dehydrogenase, decarboxylating [Homo sapiens]	52.17	1	8	20	40				0.607023	1		0.0685826	1		22.3941	1		28.8026	4	34.6433	12.9889	2	135.279										0	31.26	10	10	0	37.89	14	18	1.73164	22.15	10	12	483	53.106	7.2251
4502101	annexin A1 [Homo sapiens]	39.02	1	8	11	48	0.165066	2	129.472				0.0888033	2	17.9674	61.1221	5	77.3076	22.0932	5	31.245	52.6305	5	40.506	43.7903	1								4.32758	34.68	10	16	3.92578	26.59	7	18	8.86864	25.14	6	14	346	38.69	7.02002
4503571	alpha-enolase isoform 1 [Homo sapiens]	41.24	5	8	17	34				0.136629	2	310.941	0.167935	4	476.719	43.9528	1		40.8643	2	1.40273	43.5428	2	79.1669							32.3348	2	187.976	0	27.42	8	9	0	27.42	10	14	0	21.89	10	11	434	47.1393	7.38623
45592961	BPI fold-containing family A member 2 precursor [Homo sapiens]	32.93	1	8	8	25	0.226955	3	38.8014				0.0801992	2	213.89	19.2126	3	3.11237	86.1293	2	21.479	48.9539	2	83.7648	82.9593	2	2.99864							2.26336	16.47	5	7	0	22.09	5	7	2.27247	30.12	7	11	249	26.9947	5.59229
70167127	carbonic anhydrase 6 isoform 1 precursor [Homo sapiens]	59.74	4	8	12	140	0.210225	12	27.7982	0.162409	10	78.804	0.164819	11	32.8356	33.3813	24	86.1847	37.8013	16	25.7334	36.3509	14	7.53162	60.2454	4	31.509				92.7022	1		30.4374	55.52	11	50	25.9109	48.05	10	48	34.3338	47.73	9	42	308	35.3446	7.02002
195972866	keratin, type I cytoskeletal 10 [Homo sapiens]	44.01	2	7	22	50				0.289732	3	8.20621	0.437107	4	67.2609				41.0623	5	85.573	61.2982	6	17.4917				97.8417	1		92.8764	2	4.10284	5.68601	26.2	8	10	5.66964	34.08	15	21	5.30406	35.27	16	19	584	58.7656	5.21143
115298678	complement C3 precursor [Homo sapiens]	28.92	1	7	39	96	0.120317	1								38.3302	2	62.9592	31.0437	1														0	19.36	24	44	0	16.72	21	36	0	9.5	11	16	1663	187.03	6.40479
4505821	prolactin-inducible protein precursor [Homo sapiens]	70.55	1	7	11	103	0.146256	6	71.7044	0.390935	2	41.0697	0.348167	7	85.8407	38.6401	11	40.7992	40.2231	5	97.9091	38.0334	10	72.1665	63.1636	1		95.679	1		62.5064	4	50.7216	12.4116	63.01	8	34	7.4914	70.55	11	35	7.6231	63.01	8	34	146	16.5618	8.04541
186910296	haptoglobin isoform 2 preproprotein [Homo sapiens]	27.09	3	7	11	20	0.191823	1		0.161594	3	200.688	0.43481	3	57.8641	51.7686	1		64.4013	2	15.0338	67.2434	4	4.23771										0	13.54	4	5	2.66471	14.99	6	6	4.5252	21.04	7	9	347	38.4273	6.59521
296080693	glucose-6-phosphate isomerase isoform 1 [Homo sapiens]	30.23	2	7	14	26	0.163994	2	88.4086	0.49782	1		0.117472	1		45.0146	3	19.1803	6.25878	1		11.9803	1		35.9449	2	12.6697	12.5724	1					2.07486	20.91	9	11	2.08435	21.62	8	9	1.7952	10.72	6	6	569	64.2839	8.90967
15055535	BPI fold-containing family B member 2 precursor [Homo sapiens]	31.22	1	7	11	44	0.180093	3	353.715	0.357503	4	67.7329	0.471165	1		48.7989	6	23.296	29.9801	7	52.7412	50.2469	2	7.84542	79.5584	1		45.4958	3	20.6467				8.03082	27.95	8	13	20.5453	27.95	9	18	8.60227	22.93	8	13	458	49.1417	8.71924
205277463	transketolase isoform 1 [Homo sapiens]	45.59	2	7	18	39	0.294721	1		0.425047	2	16.6816	0.167828	2	118.966	37.3295	4	69.79	18.8604	2	361.194	27.8235	3	87.0106				16.5761	1		53.0337	1		4.08203	25.04	10	15	2.00449	32.42	11	16	2.35903	14.29	8	8	623	67.8347	7.66455
157649073	adenylyl cyclase-associated protein 1 [Homo sapiens]	25.89	1	7	10	23	0.372116	1								27.3969	3	80.0893	19.4248	2	40.3537	30.1434	2	236.372	45.7943	1								0	17.05	7	7	0	20	7	8	0	18.32	8	8	475	51.6406	8.01611
4504875	kallikrein-1 preproprotein [Homo sapiens]	45.04	1	7	8	40	0.161907	5	54.7929	0.0682827	1		0.517234	2	52.6183	21.654	9	58.8591	17.7645	5	51.6603	33.4188	4	90.6184	70.0248	2	38.4201	29.0121	1		40.2634	1		11.4017	34.35	5	13	6.94274	45.04	8	15	8.29156	45.04	7	12	262	28.8709	4.83057
131412225	keratin, type I cytoskeletal 13 isoform a [Homo sapiens]	53.71	9	6	25	81	0.24978	6	63.9216	0.366099	2	35.7553	0.273677	4	58.318	28.7728	7	74.3189	47.653	6	64.5064	57.6161	6	56.199	52.3657	3	17.2746	66.0402	1		90.3425	1		7.17733	42.58	17	25	10.8786	37.55	13	26	7.58769	41.05	20	30	458	49.5274	4.95752
119395750	keratin, type II cytoskeletal 1 [Homo sapiens]	38.82	1	6	21	51	2.01558	2	47.8569	0.400206	2	108.975				38.2791	4	126.846	32.3467	3	22.6401	29.7863	2	18.6904	57.0832	3	15.1448	59.3527	2	11.3402				8.25819	23.14	10	15	0	33.07	15	20	0	15.84	12	16	644	65.999	8.11865
94536866	zymogen granule protein 16 homolog B precursor [Homo sapiens]	48.56	1	6	9	46	0.225107	2	48.7745	0.278236	2	34.0148	0.290697	1		5.0797	4	180.072	45.0156	6	63.0503	22.2443	4	72.0418	77.7425	3	2.71033	30.4521	1		10.7856	1		3.52814	39.9	7	17	8.01022	27.88	5	13	3.35373	32.69	6	16	208	22.7246	7.38623
40254482	alpha-amylase 1 precursor [Homo sapiens]	91.39	2	6	48	785	0.211847	86	103.258	0.250137	69	64.4203	0.237146	50	77.8971	27.9531	134	85.8672	28.5247	134	65.694	25.3302	95	72.7014	52.0411	30	34.4182	57.5526	32	69.5664	60.9465	29	52.3739	276.857	87.67	36	250	345.623	80.82	37	315	291.381	81.02	30	220	511	57.7309	6.93213
4506773	protein S100-A9 [Homo sapiens]	71.93	1	6	10	48	0.203935	1		0.436248	1					55.6134	6	72.2092	45.4941	2	43.6643	45.8331	2	16.3385				67.2557	2	23.5751				7.58785	61.4	7	21	6.0238	50	5	16	2.05369	49.12	6	11	114	13.2335	6.12549
357933617	lipocalin-1 isoform 1 precursor [Homo sapiens]	53.41	3	6	10	34	0.234136	5	63.9155	0.272931	3	69.8173	0.19717	4	22.518	20.1004	5	65.1773	27.0451	4	42.8337	12.2412	5	344.459	53.8651	2	10.7006	39.5258	1		54.9409	2	38.2634	4.22885	47.16	6	10	2.02359	35.8	5	11	3.75013	42.05	7	13	176	19.2378	5.57959
21489959	immunoglobulin J chain precursor [Homo sapiens]	54.72	1	6	10	33	0.205708	3	16.9471	0.434416	2	42.4673	0.322058	4	39.8208	33.0383	5	47.8266	36.6855	4	98.7916	39.3744	4	73.1866	92.8582	1		14.6689	2	3662.05	97.3769	1		4.3389	44.03	6	6	2.48705	54.72	9	13	9.88973	48.43	8	14	159	18.087	5.23682
4501885	actin, cytoplasmic 1 [Homo sapiens]	73.6	13	5	23	63	0.215765	9	73.168	0.182248	4	49.6272	0.0548592	4	214.992	30.9987	9	58.9446	22.028	9	106.237	22.0327	7	140.56	68.8137	3	58.8421	89.4449	3	6.93388	72.3973	2	26.202	13.589	43.73	10	18	9.31969	57.07	16	25	8.71379	50.13	14	20	375	41.7097	5.47803
21614544	protein S100-A8 [Homo sapiens]	36.56	1	5	5	23	0.136781	4	40.0552	0.177311	2	64.008	0.0619707	1		32.067	5	57.8612	16.4743	4	281.248	17.6345	2	204.369	30.1327	2	145.775	34.2656	2	49.5409				6.04142	27.96	3	5	2.05946	35.48	4	9	4.86727	36.56	5	9	93	10.8276	7.03467
4504349	hemoglobin subunit beta [Homo sapiens]	40.82	5	5	5	18	0.123103	2	12.3786	0.326137	2	17.5797	0.234122	1		14.6765	2	42.4681	28.0118	2	8.64841	22.3572	3	12.0327	98.445	1		85.8897	2	8.83097	88.0756	1		2.47994	40.82	5	6	4.41694	26.53	3	6	7.61125	32.65	4	6	147	15.9883	7.28369
38455402	neutrophil gelatinase-associated lipocalin precursor [Homo sapiens]	51.01	1	5	8	18							0.20092	1		39.1557	3	32.4453	43.8269	1		14.9032	1								74.1751	1		0	36.36	5	7	0	33.33	5	6	2.95294	18.18	3	5	198	22.5737	8.90967
342187211	fructose-bisphosphate aldolase A isoform 2 [Homo sapiens]	47.13	3	5	11	19	0.197577	2	15.7377	0.293113	1		0.323924	1		34.0951	2	82.2995	11.5808	2	31.5721	32.9377	3	211.646	95.6036	1		32.0928	1		27.5505	1		1.72438	18.9	4	6	2.1905	29.19	7	7	1.65003	12.44	5	6	418	45.2321	8.25049
5902072	serpin B3 [Homo sapiens]	24.87	2	5	9	19	0.351751	1		0.077465	1		3.08414	1		17.7992	2	87.9575	21.1959	1		44.1665	3	29.1081	30.3683	1					17.3579	1		2.13031	18.46	6	7	0	18.72	7	8	1.65342	6.67	3	4	390	44.5365	6.81494
4503105	cystatin-SA precursor [Homo sapiens]	68.09	1	5	11	71	0.325826	6	152.292	0.295525	3	7.0162	0.452395	3	209.907	35.618	8	36.9745	36.3147	3	68.3955	23.9923	7	64.0569	54.4391	2	21.8377	22.9573	2	156.242	89.9836	2	7.12491	26.8018	52.48	6	20	22.4171	59.57	8	28	14.5894	65.96	9	23	141	16.4342	4.93213
5031863	galectin-3-binding protein precursor [Homo sapiens]	33.68	1	5	16	34				2.02733	1					39.1355	2	19.2401	20.1147	3	9.14724	8.84486	2	16.0049				9.32936	1		33.2708	1		2.05046	24.79	10	14	2.2192	23.76	8	12	2.16775	15.56	6	8	585	65.2893	5.2749
4504183	glutathione S-transferase P [Homo sapiens]	39.52	1	5	6	17	0.1203	2	375.339	0.229813	2	142.274				26.8749	1		55.9656	2	44.3299				73.5388	1		90.016	1					2.72247	20	3	4	4.72942	31.43	4	8	0	30.95	4	5	210	23.341	5.64307
4557321	apolipoprotein A-I preproprotein [Homo sapiens]	51.69	1	5	13	22				0.297916	2	38.2401	0.404081	1		25.3986	1		26.0147	2	11.9621	27.4683	2	91.3368				62.8049	1		40.1987	1		0	25.84	6	6	0	29.21	6	7	2.6302	32.58	8	9	267	30.7589	5.75732
13489087	leukocyte elastase inhibitor [Homo sapiens]	45.12	1	5	10	52				0.173524	2	288.356							52.2869	2	45.1952				46.9218	1								0	21.11	3	14	1.6341	19.53	6	21	0	15.83	4	17	379	42.7147	6.27783
295986608	immunoglobulin lambda-like polypeptide 5 isoform 1 [Homo sapiens]	66.36	2	5	8	47							0.216299	1		19.0724	2	39.291	52.6707	2	12.6296	11.5859	2	238.524							21.1371	1		11.8809	54.21	6	20	7.86275	51.87	5	16	2.20803	45.33	5	11	214	23.0486	8.83643
20070125	protein disulfide-isomerase precursor [Homo sapiens]	32.48	1	5	13	22	0.593443	1					0.167725	1		32.8479	1					30.1393	1		55.3514	1								0	13.98	6	7	0	22.83	8	9	0	8.46	4	6	508	57.0807	4.86865
19882251	cystatin-SN precursor [Homo sapiens]	65.25	1	5	11	145	0.108909	6	97.8936	0.219539	8	120.772	1.05061	2	441.729	23.0865	16	53.2409	28.6151	18	44.7281	28.5919	9	15.7561	26.2555	2	344.512	65.2356	4	32.6746				31.3387	60.28	8	54	50.4962	60.28	9	50	27.0918	62.41	8	41	141	16.3773	7.21045
74272287	matrix metalloproteinase-9 preproprotein [Homo sapiens]	38.47	1	4	20	27				0.173243	1		0.174843	2	117.273	52.2909	1		20.0187	2	74.9811	22.3604	3	67.1641				73.6426	1					0	9.62	5	5	0	28.01	13	13	0	16.55	8	9	707	78.4084	6.06201
342307069	BPI fold-containing family A member 1 precursor [Homo sapiens]	26.95	1	4	5	16	0.180614	2	17.9005							75.8924	2	25.9425				34.3321	2	148.199										1.68272	16.8	3	5	0	21.48	4	5	8.36388	21.09	4	6	256	26.6959	5.75732
5729877	heat shock cognate 71 kDa protein isoform 1 [Homo sapiens]	34.37	3	4	14	29	0.380759	2	55.9985	0.102279	1		0.18878	1		35.6811	5	60.3717	60.3199	2	34.4901	38.2754	3	30.4694				46.4047	1					4.46348	22.45	10	12	3.40126	16.1	7	10	1.61517	16.72	6	7	646	70.8542	5.51611
4503117	cystatin-B [Homo sapiens]	79.59	1	4	6	31	0.640872	1		0.93924	3	42.5493	0.326458	3	19.1552	27.8551	2	148.01	40.2836	4	13.3922	45.4796	4	28.5862	21.0188	1		30.5002	2	72.4876	64.2158	1		2.23947	21.43	3	7	12.7059	79.59	6	13	16.4436	55.1	5	11	98	11.1326	7.56201
4503107	cystatin-C precursor [Homo sapiens]	59.59	1	4	8	22	0.250563	1		0.282893	1					54.4947	2	3.80066	61.6211	2	20.3598	24.2401	1											0	41.1	6	6	0	59.59	6	11	0	36.3	4	5	146	15.7891	8.74854
355594753	clusterin preproprotein [Homo sapiens]	31.18	1	4	13	39	0.0253159	2	199.598	0.0334967	1					62.4695	4	17.3868				79.139	1											3.77323	23.39	9	17	1.87673	18.04	8	15	0	15.14	6	7	449	52.461	6.26514
349732256	thioredoxin isoform 2 [Homo sapiens]	38.82	2	4	4	8										54.8364	1					28.8132	1											0	21.18	2	2	0	38.82	4	4	0	21.18	2	2	85	9.44569	6.03662
4503549	neutrophil elastase preproprotein [Homo sapiens]	57.3	1	4	11	20	0.081642	1		0.114705	2	35.184	0.235763	1		34.693	4	18.2817	30.3797	3	181.547	21.1436	3	417.509				93.1679	1					2.70801	50.19	6	7	2.5316	37.45	8	9	2.43716	10.49	3	4	267	28.4998	9.34912
194097352	alpha-actinin-1 isoform c [Homo sapiens]	26.27	7	4	26	93				0.126104	1		0.262525	2	28.0193	2.61099	1		26.3869	4	7.3143	26.7278	2	121.356							64.5072	1		2.14809	18.71	14	30	1.62643	15.9	15	38	1.64974	13.75	11	25	887	102.644	5.50342
208973242	14-3-3 protein zeta/delta [Homo sapiens]	54.29	3	4	15	39	0.317466	1								36.5392	1		37.1537	1					70.0505	1								0	30.61	7	10	0	48.98	12	19	0	31.84	8	10	245	27.7277	4.79248
226529917	triosephosphate isomerase isoform 2 [Homo sapiens]	46.15	3	4	10	27	0.128831	2	80.3251	0.15671	1					44.5632	2	44.6242	2.6919	2	1342.63	49.4661	1					3.68966	1					0	32.87	6	10	0	29.37	6	9	0	33.92	7	8	286	30.7717	5.92236
58219024	UPF0762 protein C6orf58 precursor [Homo sapiens]	45.76	1	4	12	40	0.386534	2	16.4876	0.245427	1					22.1239	4	35.5638	29.7639	2	44.3174	40.2645	5	20.1464	67.8519	1		91.1432	1					7.23474	22.73	7	16	6.19254	41.21	8	15	7.2037	20.91	5	9	330	37.9016	6.15088
7706635	cornulin [Homo sapiens]	54.34	1	4	17	33							0.0128805	1					72.6923	1		37.7447	2	3.29973										2.98007	34.14	10	12	6.75228	18.79	7	9	2.71936	30.71	9	12	495	53.5016	6.1001
4557894	lysozyme C precursor [Homo sapiens]	66.22	1	4	10	24	0.111086	1		0.120634	2	6.1731				40.7014	2	29.8508	20.8048	2	23.2583													0	43.24	4	7	0	50	6	8	0	58.11	8	9	148	16.5263	9.15869
4503109	cystatin-S precursor [Homo sapiens]	75.18	1	4	11	169	0.29904	15	80.4436	0.325177	10	56.8394	0.272903	6	10043.4	27.7141	27	49.3009	27.455	17	59.6663	31.4658	13	30.538	29.584	9	87.9569	30.4686	7	98.5354	6.30177	1		51.8928	75.18	9	64	47.2347	75.18	11	66	29.4759	72.34	9	39	141	16.204	5.021
332164775	pyruvate kinase isozymes M1/M2 isoform c [Homo sapiens]	42.64	6	3	24	58				0.258999	1		0.279282	2	270.398				9.41713	1		49.2268	2	8.15975				36.3597	1		62.5206	1		0	28.6	12	19	0	21.82	10	20	0	27.11	12	19	605	65.8888	7.86963
190341024	SPARC-like protein 1 precursor [Homo sapiens]	41.57	1	3	15	21				0.2987	1					12.3152	1		26.5462	1								88.8724	1					0	32.38	11	11	4.56285	15.81	6	7	0	6.02	3	3	664	75.1613	4.80518
189458821	protein-glutamine gamma-glutamyltransferase E [Homo sapiens]	37.95	1	3	16	26	0.219382	1								20.0468	1					36.243	3	19.5657	91.3787	1								0	8.95	5	5	0	26.84	11	12	0	19.34	8	9	693	76.5836	5.85889
66932947	alpha-2-macroglobulin precursor [Homo sapiens]	14.59	1	3	15	27	0.0999089	1								37.3192	2	162.119																2.50333	6.78	8	9	0	8.62	9	9	0	8.01	7	9	1474	163.189	6.41748
71361688	myeloblastin precursor [Homo sapiens]	58.98	1	3	9	22	0.599246	3	35.2683				0.478979	1		40.202	4	50.9924	40.6258	1		44.5559	2	22.3366	35.489	1								1.87988	42.58	7	9	5.41465	23.83	5	8	2.87262	24.61	4	5	256	27.7893	8.35303
4557759	myeloperoxidase precursor [Homo sapiens]	47.11	1	3	31	46	0.105614	1					0.202357	2	81.4033	27.1112	3	69.5661	56.8451	1		33.8407	2	29.4467										2.00508	32.62	16	17	1.92878	22.82	13	14	2.36056	17.32	12	15	745	83.8148	8.96826
11321561	hemopexin precursor [Homo sapiens]	39.83	1	3	14	28				0.334779	1								48.3276	1		49.237	1											0	15.8	5	7	0	33.33	10	12	2.23248	28.57	9	9	462	51.6433	7.02002
4826898	profilin-1 [Homo sapiens]	47.86	1	3	7	19	0.415158	1								46.2963	1					35.1508	1											0	21.43	2	3	0	36.43	6	7	0	47.86	6	9	140	15.0446	8.26514
12667788	myosin-9 [Homo sapiens]	26.94	4	3	47	84				0.609953	1								3.40703	1								5.58573	1					0	11.33	19	27	0	16.17	25	37	0	11.99	15	20	1960	226.392	5.60498
5454052	14-3-3 protein sigma [Homo sapiens]	48.39	3	3	12	24	0.317466	1					0.388056	1		36.5392	1					4.85116	1								12.5012	1		2.69608	37.9	8	10	2.99926	22.98	5	6	2.45508	34.68	8	8	248	27.7567	4.7417
260099723	L-lactate dehydrogenase A chain isoform 3 [Homo sapiens]	50.14	6	3	15	40				0.515332	1					27.2288	2	38.9447	41.0882	1								79.7316	1					0	39.06	10	15	0	39.34	11	16	0	27.7	7	9	361	39.8119	8.42627
384475528	gelsolin isoform d [Homo sapiens]	32.49	5	3	16	22				0.0978106	1		0.0514535	1					19.1427	2	110.673	29.982	2	123.652										0	15.51	6	6	3.17334	16.71	8	10	2.99613	7.49	6	6	748	82.4743	5.63037
110224479	proactivator polypeptide isoform c preproprotein [Homo sapiens]	26.43	3	3	7	23	0.373189	1								25.9058	2	40.3395							90.2005	1								0	21.48	6	13	0	14.83	3	7	0	11.22	3	3	526	58.3169	5.13525
32455264	peroxiredoxin-1 [Homo sapiens]	26.13	2	3	5	7				0.0217915	1		0.315472	2	4.91285							26.7659	2	66.7604							54.5001	1		0	4.02	1	1	0	9.05	2	2	0	22.11	4	4	199	22.0963	8.1333
5453914	phospholipid transfer protein isoform a precursor [Homo sapiens]	37.53	4	3	15	29	0.283418	1					0.733337	1		25.8134	2	60.9134				19.6518	1								26.7977	1		2.89627	31.24	10	14	3.32665	19.07	6	9	2.07667	19.68	6	6	493	54.7045	7.00537
4758638	peroxiredoxin-6 [Homo sapiens]	26.79	1	3	4	16										53.8533	1																	0	9.38	2	7	0	22.77	3	5	0	9.38	2	4	224	25.0192	6.37939
4505753	phosphoglycerate mutase 1 [Homo sapiens]	25.2	3	3	4	7	0.39901	1		0.481231	1		0.514804	1		11.2541	2	95.816	9.873	1		7.94175	2	146.194	48.611	1		20.5162	1		7.49987	1		2.53736	15.75	3	3	2.44625	4.33	1	1	5.88	18.11	3	3	254	28.7858	7.18115
183076548	histone H3.2 [Homo sapiens]	35.29	5	3	3	7	0.138728	2	2.80914	0.120307	1		0.123898	1		17.3283	2	37.6151	27.2845	1		31.5712	2	17.056	95.8968	1								0	11.76	2	2	0	28.68	2	3	0	28.68	2	2	136	15.3785	11.2681
21071008	transcobalamin-1 precursor [Homo sapiens]	19.4	1	3	5	17										16.6719	3	5.54718	3.94005	1														7.60603	17.78	3	6	3.31517	14.32	4	9	0	6.24	2	2	433	48.176	5.03369
5803187	transaldolase [Homo sapiens]	21.36	1	3	7	11				0.103395	1		0.199612	1					64.0145	3	30.1269	5.56401	1								27.8741	1		0	7.12	2	2	0	11.87	4	6	0	9.2	3	3	337	37.5165	6.81494
19882256	cystatin-D precursor [Homo sapiens]	38.73	1	3	5	12	0.120263	1								36.0492	2	87.6764																0	33.8	3	6	1.99262	25.35	3	3	0	38.73	3	3	142	16.0699	7.1665
300244560	cysteine-rich secretory protein 3 isoform 1 precursor [Homo sapiens]	24.81	2	2	7	15	0.868537	1											68.705	1		36.8807	1											0	5.81	2	3	0	24.81	6	8	0	14.34	3	4	258	29.0458	7.79639
119703744	desmoglein-1 preproprotein [Homo sapiens]	25.07	1	2	23	75										28.6982	1		18.1499	1		11.3906	1											2.13635	15.35	11	35	2.137	18.49	13	28	0	17.25	12	12	1049	113.676	5.03369
4826870	nucleobindin-2 precursor [Homo sapiens]	24.52	1	2	11	33																												0	12.86	5	10	0	22.62	10	14	0	11.67	6	9	420	50.1914	5.12256
222418647	mucin-7 precursor [Homo sapiens]	16.98	1	2	5	12	0.245269	1								37.2958	1					62.9615	1											0	6.63	3	3	0	6.63	3	4	0	12.47	3	5	377	39.1347	8.77783
189163540	alpha-1-antitrypsin precursor [Homo sapiens]	20.57	1	2	6	9	0.228227	1					0.528006	1		32.9026	1					42.6004	1								80.6818	1		0	11.72	3	4	0	3.59	1	1	0	7.66	3	4	418	46.707	5.59229
378404908	glyceraldehyde-3-phosphate dehydrogenase isoform 2 [Homo sapiens]	20.82	2	2	6	10	0.302003	1		0.520942	1					18.4399	1		29.521	1					61.0585	1		56.6684	1					2.27277	4.78	1	2	0	18.77	4	4	0	15.36	3	4	293	31.528	7.60596
62414289	vimentin [Homo sapiens]	44.42	1	2	16	22													7.0011	1														0	25.11	7	8	0	26.18	10	10	0	12.88	4	4	466	53.6191	5.12256
27894319	interleukin-1 receptor antagonist protein isoform 1 precursor [Homo sapiens]	69.49	4	2	7	13										26.5306	1																	0	54.24	4	4	1.72387	58.76	6	7	0	32.2	2	2	177	20.042	6.18896
4504345	hemoglobin subunit alpha [Homo sapiens]	21.83	1	2	2	4	0.212545	1		0.310024	1					13.5746	1		7.55085	1		27.397	1		63.8667	1		24.3557	1					3.3641	10.56	1	1	2.49157	21.83	2	2	2.88913	10.56	1	1	142	15.2479	8.67529
410172827	PREDICTED: fatty acid-binding protein, epidermal-like [Homo sapiens]	64.44	2	2	7	17	0.267783	2	69.533							12.2936	2	762.007				11.2729	1		17.9586	1								0	63.7	6	7	0	50.37	5	7	0	40.74	3	3	135	15.1434	5.36377
167857790	alpha-1-acid glycoprotein 1 precursor [Homo sapiens]	28.86	1	2	5	22	0.118283	1								24.0199	3	42.4968																4.97529	25.87	4	8	1.86023	22.39	3	8	0	18.41	3	6	201	23.5248	5.10986
119964718	desmoglein-3 preproprotein [Homo sapiens]	19.02	1	2	14	44				0.250854	1		0.262425	1		10.6803	1					39.9534	1											0	11.91	9	17	1.60671	12.71	8	15	0	5.91	5	12	999	107.465	4.99561
4507809	uteroglobin precursor [Homo sapiens]	70.33	1	2	3	6																												0	70.33	3	4	0	10.99	1	1	0	10.99	1	1	91	9.98708	5.05908
4507509	metalloproteinase inhibitor 1 precursor [Homo sapiens]	24.64	1	2	6	17				4.4748	1		3.16686	1					23.8589	1		34.9102	2	2.4356				5.33184	1		11.2061	1		0	16.91	3	6	0	20.29	5	7	0	21.26	4	4	207	23.1555	8.104
4557014	catalase [Homo sapiens]	47.63	1	2	17	22				0.348453	1		0.264299	1					27.0552	1		69.7585	1					77.6438	1					0	25.62	7	8	0	22.2	7	8	0	15.75	6	6	527	59.7188	7.38623
4503689	fibrinogen alpha chain isoform alpha-E preproprotein [Homo sapiens]	36.49	2	2	19	45				0.204007	2	22.5978				26.6988	1		45.9358	2	49.9023	37.4882	3	1.95155										2.19852	22.86	14	22	0	14.2	7	13	0	11.55	7	10	866	94.9144	6.01123
4758950	peptidyl-prolyl cis-trans isomerase B precursor [Homo sapiens]	48.15	1	2	8	10							0.190529	1								2.80248	1								14.709	1		0	42.13	6	6	0	12.04	2	2	0	12.5	2	2	216	23.7275	9.40771
10835256	apoptosis-associated speck-like protein containing a CARD isoform a [Homo sapiens]	29.23	2	2	2	4										32.6804	1																	0	6.15	1	1	0	23.08	1	2	0	6.15	1	1	195	21.6133	6.34131
5902134	coronin-1A [Homo sapiens]	38.83	1	2	11	22										58.3125	1																	0	24.08	6	10	0	17.57	6	8	0	13.23	4	4	461	50.9938	6.68311
324021745	vitamin D-binding protein isoform 3 precursor [Homo sapiens]	37.12	2	2	11	17	0.0405489	1		0.710617	1					26.8115	1		24.6765	1								34.7255	1					0	20.08	6	7	0	11.16	3	5	0	17.65	4	5	493	55.041	5.63037
10863927	peptidyl-prolyl cis-trans isomerase A [Homo sapiens]	43.64	7	2	9	15							1.01229	1								69.9388	2	16.2318							61.9691	1		0	18.79	4	5	0	23.03	2	2	0	30.91	6	8	165	18.0009	7.81104
4505763	phosphoglycerate kinase 1 [Homo sapiens]	24.46	1	2	7	13										21.9089	2	73.7835																0	9.59	3	5	0	19.9	5	6	0	4.56	2	2	417	44.5861	8.104
206597441	aldehyde dehydrogenase, dimeric NADP-preferring [Homo sapiens]	17.66	1	2	8	13	0.156828	1		0.250137	1					29.3603	1		25.2554	1														0	3.31	2	2	0	13.69	6	6	0	11.26	5	5	453	50.3628	6.53662
5031839	keratin, type II cytoskeletal 6A [Homo sapiens]	50	5	2	21	58	0.479267	1					0.0941575	3	611.091	18.8629	4	107.912	24.3761	1		22.8504	4	79.0841	36.0679	2	50.3264				46.7458	1		2.26346	32.45	12	18	2.09102	36.35	10	21	4.82892	18.62	11	19	564	60.0083	8.00146
7657532	protein S100-A6 [Homo sapiens]	45.56	1	2	3	4	0.340804	1								31.3398	1								91.9584	1								2.02998	36.67	2	2	0	45.56	2	2					90	10.1733	5.47803
4505257	moesin [Homo sapiens]	33.8	4	2	21	30				0.336895	2	30.1413							36.0467	2	30.6906													0	24.61	14	14	0	17.85	10	10	0	8.15	5	6	577	67.7778	6.40479
24119203	tropomyosin alpha-3 chain isoform 2 [Homo sapiens]	36.29	16	2	10	17													43.5585	1		60.8821	1											0	15.73	4	4	0	33.06	7	7	0	14.11	4	6	248	29.0147	4.77979
4505029	leukotriene A-4 hydrolase isoform 1 [Homo sapiens]	32.41	3	2	13	29																												0	26.68	9	13	0	14.57	6	7	0	11.78	6	9	611	69.2412	6.17627
16418467	leucine-rich alpha-2-glycoprotein precursor [Homo sapiens]	16.71	1	2	5	11													13.4292	1		18.3197	2	35.579										0	4.61	2	2	0	12.1	3	4	0	14.99	4	5	347	38.1541	6.94678
4503143	cathepsin D preproprotein [Homo sapiens]	22.33	1	2	9	12							0.048001	1																				0	22.09	7	7	0	9.71	1	2	0	4.85	3	3	412	44.5236	6.53662
4758146	neutrophil defensin 1 preproprotein [Homo sapiens]	35.11	2	2	7	17	0.0771906	1		0.264286	1		0.243229	2	77.5973	30.5845	1		35.191	2	178.242	42.095	2	33.3806				59.445	1		87.4778	1		0	27.66	4	5	0	28.72	4	7	0	32.98	4	5	94	10.1942	6.99072
148229144	small proline-rich protein 3 [Homo sapiens]	23.67	1	2	4	8	0.692743	1								80.9592	1																	0	18.93	3	3	0	14.2	2	2	0	18.93	3	3	169	18.1422	8.57275
70906435	fibrinogen beta chain isoform 1 preproprotein [Homo sapiens]	52.34	2	2	23	45																			69.4519	1								0	36.66	13	19	0	29.12	10	17	2.0844	26.48	8	9	491	55.8923	8.26514
4505529	alpha-1-acid glycoprotein 2 precursor [Homo sapiens]	30.35	1	2	5	27	0.472811	2	28.8484	0.149972	2	96.432	0.0902904	2	131.551	39.831	2	23.1612	11.2455	2	101.032	6.61232	3	3.49805	84.243	2	5.41848	74.984	2	2.78875	36.3816	1		5.10227	27.36	4	8	2.39344	21.39	3	10	6.29014	24.38	4	9	201	23.5876	5.10986
41406094	dnaJ homolog subfamily C member 12 isoform b [Homo sapiens]	25.23	2	2	2	8																												0	25.23	2	3	0	16.82	1	3	0	16.82	1	2	107	12.4481	5.10986
13775198	SH3 domain-binding glutamic acid-rich-like protein 3 [Homo sapiens]	27.96	1	2	3	5										33.6034	1		41.4397	1		27.7954	1											0	20.43	1	1	0	27.96	2	2	0	20.43	2	2	93	10.4313	4.93213
77539055	ubiquitin-60S ribosomal protein L40 precursor [Homo sapiens]	28.13	4	2	4	10	0.226471	1		0.0973026	1		0.15792	2	88.6484	16.5417	1		26.7262	2	140.594	15.4673	2	76.9635	73.0413	1					92.8328	1		0	14.06	2	2	0	28.13	4	4	0	14.06	2	4	128	14.719	9.83252
169646441	rab GDP dissociation inhibitor beta isoform 2 [Homo sapiens]	35.5	2	2	13	21	0.34988	1								52.8532	2	30.161																0	28.5	7	7	0	24	7	8	0	15.25	5	6	400	45.5902	6.23975
294774585	otogelin-like protein precursor [Homo sapiens]	24.02	1	1	39	66																												0	9.94	17	22	0	13.4	19	22	0	8.58	15	22	2344	263.351	5.13525
268834192	beta-glucuronidase precursor [Homo sapiens]	23.96	1	1	12	21										10.779	1																	0	15.98	6	7	0	8.45	5	7	0	15.36	5	7	651	74.6847	7.02002
90669307	G2/mitotic-specific cyclin-B3 isoform 3 [Homo sapiens]	23.51	1	1	23	31																												0	11.4	11	12	0	17.63	10	11	0	10.47	8	8	1395	157.816	6.68311
26787962	advanced glycosylation end product-specific receptor isoform 7 precursor [Homo sapiens]	16.96	1	1	6	8	0.408468	1								0.514393	1								1.25932	1								0	7.31	3	3	0	11.4	4	4	0	1.75	1	1	342	36.1707	9.64209
16507237	78 kDa glucose-regulated protein precursor [Homo sapiens]	19.88	1	1	12	30				0.102279	1								75.6252	1														0	14.53	8	10	1.71167	15.14	8	12	0	9.94	5	8	654	72.2884	5.16064
194306543	oxidation resistance protein 1 isoform 2 [Homo sapiens]	35.16	1	1	19	42																												0	21.33	9	12	0	31.35	15	20	0	8.58	3	10	839	93.676	5.18604
115387106	neuroblastoma suppressor of tumorigenicity 1 isoform 1 [Homo sapiens]	63.89	4	1	5	11																												0	37.96	3	4	0	54.17	3	5	0	7.87	2	2	216	23.1541	6.20166
34734079	frizzled-6 isoform a precursor [Homo sapiens]	21.39	2	1	8	11																												0	17.14	5	8	0	1.84	1	1	0	2.41	2	2	706	79.24	7.95752
258547124	mitochondrial coenzyme A transporter SLC25A42 [Homo sapiens]	32.08	1	1	7	8																												0	12.89	2	2	0	21.07	4	4	0	6.92	2	2	318	35.3866	10.0669
238231392	dedicator of cytokinesis protein 8 isoform 1 [Homo sapiens]	25.06	3	1	41	133																												0	13.05	22	47	0	13.67	22	54	0	10.62	16	32	2099	238.377	6.87354
225703077	dual specificity protein phosphatase 21 [Homo sapiens]	45.26	1	1	5	12																												0	14.74	2	4	0	36.84	4	5	0	30.53	3	3	190	21.5149	8.82178
218931224	choline O-acetyltransferase isoform 3 [Homo sapiens]	34.53	3	1	19	42																												0	21.77	13	18	0	22.82	11	15	0	8.86	6	9	666	74.3448	8.01611
193083197	ubiquitin-like domain-containing CTD phosphatase 1 [Homo sapiens]	12.26	1	1	3	19																												0	10.06	2	4	0	7.55	2	9	0	7.55	2	6	318	36.7812	6.45557
167860126	serpin B5 [Homo sapiens]	12	1	1	3	5																												0	5.07	1	1	0	9.6	2	3	0	2.4	1	1	375	42.0734	6.04932
164565408	pleckstrin homology domain-containing family G member 2 [Homo sapiens]	23.67	1	1	22	49																												0	19.12	16	22	0	11.18	11	19	0	9.67	7	8	1386	147.877	5.85889
161702986	ezrin [Homo sapiens]	27.65	4	1	21	50				0.41103	1					23.7372	1		44.1317	1														0	11.95	8	18	0	14.85	11	18	0	19.8	13	14	586	69.3697	6.26514
158420731	chromodomain-helicase-DNA-binding protein 3 isoform 3 [Homo sapiens]	25.93	3	1	38	55																												0	13.5	19	23	0	14.13	18	19	0	9.23	10	13	2059	232.891	6.22705
157502193	26S proteasome non-ATPase regulatory subunit 13 isoform 1 [Homo sapiens]	24.47	2	1	5	13										4.42917	1																	0	14.1	2	4	0	11.7	3	6	0	11.44	3	3	376	42.9181	5.80811
154448886	proline-rich protein 4 isoform 2 precursor [Homo sapiens]	36.57	1	1	5	11	0.55361	2	77.994	0.466837	1		0.426231	1		5.65392	2	63.5108	44.465	1		21.7837	2	42.4612	10.2128	2	10.7517	95.2475	1		67.259	1		2.87621	30.6	3	4	3.19924	17.16	2	3	2.47857	21.64	3	4	134	15.0876	7.06396
153792095	polypeptide N-acetylgalactosaminyltransferase 11 [Homo sapiens]	48.85	1	1	19	41	0.0690214	1								29.3458	1																	0	20.89	8	12	0	37.01	12	19	0	15.46	7	10	608	68.8748	8.19189
150378539	protein piccolo isoform 1 [Homo sapiens]	21.43	2	1	75	152																												0	11.8	41	59	0	12.31	38	56	0	10.7	28	37	5142	560.355	6.46826
148747556	PIN2/TERF1-interacting telomerase inhibitor 1 [Homo sapiens]	14.02	1	1	3	7																37.6447	1											0	4.57	2	2	0	11.59	2	2	0	14.02	3	3	328	37.012	9.59814
145701028	protein midA homolog, mitochondrial isoform 3 [Homo sapiens]	32.94	1	1	8	13										20.7644	1																	0	11.37	3	3	0	18.08	4	5	0	16.62	4	5	343	37.9977	8.60205
121949817	DENN domain-containing protein 2C isoform 2 [Homo sapiens]	24.68	2	1	20	29				0.0370909	1								26.9711	1														0	16.53	10	10	0	12.17	8	9	0	10.22	8	10	871	100.142	7.97217
116256331	neprilysin [Homo sapiens]	18.27	1	1	11	17																												0	14.53	7	8	0	12.53	5	6	0	5.33	3	3	750	85.4599	5.73193
115430237	spectrin beta chain, non-erythrocytic 4 isoform sigma1 [Homo sapiens]	38.73	1	1	74	147																												0	28.24	42	57	0	20.55	38	51	0	18.95	33	39	2564	288.808	6.01123
79749430	FRAS1-related extracellular matrix protein 2 precursor [Homo sapiens]	22.81	1	1	48	68																												0	11.49	21	26	0	12.09	21	21	0	11.68	20	21	3169	350.937	5.03369
55956899	keratin, type I cytoskeletal 9 [Homo sapiens]	34.67	1	1	18	30				1.35677	1		0.268019	1					76.5089	1		58.1566	1					56.3904	1					0	24.24	9	9	0	27.77	10	14	1.93939	15.25	6	7	623	62.0268	5.23682
224586875	coiled-coil domain-containing protein 65 [Homo sapiens]	18.39	1	1	8	8										3.03674	1																	0	8.68	3	3	0	7.23	4	4	0	2.48	1	1	484	57.2612	7.43018
224282187	homeodomain-only protein isoform a [Homo sapiens]	68.13	2	1	3	3																												0	68.13	3	3									91	10.4201	5.23682
198442844	dynein heavy chain 10, axonemal [Homo sapiens]	25.3	1	1	92	209													22.6261	1														0	9.86	39	74	0	16.51	51	80	0	11.12	34	55	4471	514.512	5.88428
194394158	nicotinate phosphoribosyltransferase [Homo sapiens]	22.3	1	1	8	20										28.0453	1																	0	13.38	5	9	0	13.2	3	5	0	15.99	4	6	538	57.542	5.68115
190194355	protein CIP2A [Homo sapiens]	12.38	1	1	9	102										14.191	1																	0	4.75	3	41	0	11.27	8	41	0	5.75	4	20	905	102.121	6.22705
190014603	TBC1 domain family member 13 [Homo sapiens]	43.5	1	1	9	11																												0	24.25	4	4	0	11.75	3	4	0	12.25	3	3	400	46.5236	5.23682
157168362	purine nucleoside phosphorylase [Homo sapiens]	41.87	1	1	14	31																												0	26.99	9	15	0	14.88	4	6	0	29.41	8	10	289	32.0972	6.94678
154355000	far upstream element-binding protein 2 [Homo sapiens]	47.54	1	1	21	54													66.2015	2	2.4107													0	36.43	15	25	0	20.11	10	15	0	27.71	10	14	711	73.07	7.29834
154146262	IgGFc-binding protein precursor [Homo sapiens]	26.86	1	1	43	61													64.0923	1														0	15.43	21	22	0	12.95	20	22	0	8.07	14	17	5405	571.639	5.33838
151105229	intraflagellar transport protein 74 homolog isoform a [Homo sapiens]	24.83	2	1	12	19																												0	10.67	6	7	0	18.83	8	8	0	6.5	4	4	600	69.1961	5.99854
150456444	protein unc-79 homolog [Homo sapiens]	23.35	1	1	34	53																												0	14.4	18	21	0	8.71	15	18	0	8.83	13	14	2458	275.256	6.29053
119360348	tissue alpha-L-fucosidase precursor [Homo sapiens]	8.15	1	1	3	9																32.4154	1											0	5.79	2	4	0	8.15	3	3	0	3.65	2	2	466	53.6547	6.84424
115270953	zinc finger protein 117 [Homo sapiens]	15.32	1	1	8	9																												0	7.25	3	3	0	7.04	4	4	0	2.9	2	2	483	56.339	9.33447
71037379	glycogen phosphorylase, liver form isoform 1 [Homo sapiens]	28.22	2	1	16	25													12.4615	1														0	20.07	8	9	2.55718	14.99	8	8	0	9.8	6	8	847	97.087	7.1665
29336063	plexin-B3 isoform 1 precursor [Homo sapiens]	31.85	2	1	27	46	0.238745	1								25.6458	1																	0	15.19	11	14	0	12.36	13	19	0	11.52	10	13	1909	206.716	6.40479
19923586	histone-lysine N-methyltransferase, H3 lysine-36 and H4 lysine-20 specific isoform b [Homo sapiens]	27.89	2	1	44	84	0.497541	1								38.4735	1								77.3273	1								0	16.54	22	30	0	17.8	26	37	0	9.83	14	17	2696	296.464	8.03076
19115954	dynein heavy chain 5, axonemal [Homo sapiens]	23.08	1	1	82	140																												0	14.49	43	57	0	10.08	36	44	2.00802	10.53	32	39	4624	528.684	6.1001
13435364	desmocollin-2 isoform Dsc2a preproprotein [Homo sapiens]	28.19	2	1	16	31																												0	17.31	10	14	0	16.65	8	10	0	12.1	5	7	901	99.8987	5.33838
5729770	tripeptidyl-peptidase 1 preproprotein [Homo sapiens]	26.64	1	1	6	10										24.9592	1																	0	4.97	2	2	0	8.53	2	4	0	19.89	4	4	563	61.2096	6.48096
4826659	F-actin-capping protein subunit beta isoform 1 [Homo sapiens]	50	2	1	11	19																												0	23.9	4	4	0	31.25	6	8	0	19.85	4	7	272	30.6094	5.99854
4557565	DNA excision repair protein ERCC-6 [Homo sapiens]	24.31	1	1	26	45																												0	12.32	12	16	0	15.54	14	16	0	11.52	10	13	1493	168.311	8.08936
154937327	zinc finger protein 593 [Homo sapiens]	31.34	1	1	5	8																												0	8.96	1	1	0	21.64	2	3	0	26.87	2	4	134	15.1897	9.81787
66880553	Fanconi anemia group A protein isoform a [Homo sapiens]	32.23	1	1	32	50				0.291244	1																							0	21.31	16	21	0	18.63	18	21	0	6.25	8	8	1455	162.671	6.59521
58218968	calmodulin [Homo sapiens]	34.23	1	1	5	7																						95.0496	1					0	23.49	3	3	0	16.78	2	2	0	7.38	1	2	149	16.8268	4.22119
55956910	probable tumor suppressor protein MN1 [Homo sapiens]	33.41	1	1	24	39																												0	21.06	14	15	0	10.23	8	12	0	11.14	8	12	1320	135.917	6.7124
75677365	dynein heavy chain 2, axonemal [Homo sapiens]	32.71	1	1	106	202				0.410098	1								52.0147	1														0	16.96	48	70	0	19.31	56	80	0	12.29	35	52	4427	507.375	6.3667
71040111	fibromodulin precursor [Homo sapiens]	5.32	1	1	3	5																												0	1.86	1	1	0	5.32	2	2	0	3.19	1	2	376	43.1515	6.03662
67782311	helicase SKI2W [Homo sapiens]	21.35	1	1	19	28																												0	7.95	6	8	0	13.8	10	11	0	11.56	8	9	1246	137.668	6.06201
57242798	acid sphingomyelinase-like phosphodiesterase 3b isoform 1 precursor [Homo sapiens]	34.73	1	1	6	14																												0	19.12	3	3	0	25.93	5	8	0	10.33	2	3	455	50.7812	5.64307
56699495	WAP four-disulfide core domain protein 2 precursor [Homo sapiens]	70.16	1	1	5	6																												0	63.71	4	4	0	6.45	1	1	0	6.45	1	1	124	12.9839	4.84326
56676393	rho GDP-dissociation inhibitor 2 [Homo sapiens]	36.32	1	1	4	6																												0	6.47	1	1	0	29.85	3	3	0	11.44	2	2	201	22.9736	5.21143
40317626	thrombospondin-1 precursor [Homo sapiens]	36.75	1	1	25	36	0.485368	1								46.879	1								96.5845	1								1.70257	19.23	11	12	0	14.96	10	13	0	18.63	11	11	1170	129.3	4.94482
409971421	junctophilin-3 isoform 2 [Homo sapiens]	43.55	1	1	3	4																												0	15.05	2	3	0	28.49	1	1					186	19.6111	6.07471
344179112	scavenger receptor cysteine-rich type 1 protein M130 isoform b precursor [Homo sapiens]	34.52	1	1	23	39																												0	27.74	16	19	0	17.4	9	11	0	8.92	6	9	1121	121.53	6.11279
119829187	collagen alpha-1(XVII) chain [Homo sapiens]	33.87	1	1	33	81				0.165719	1								24.1018	1														0	24.05	17	30	0	17.5	17	28	0	12.56	13	23	1497	150.326	8.79248
21536468	tyrosine-protein kinase receptor UFO isoform 2 precursor [Homo sapiens]	33.33	2	1	22	72																												0	18.19	11	32	0	21.58	12	25	0	24.86	11	15	885	97.3155	5.35107
5803227	14-3-3 protein theta [Homo sapiens]	37.96	3	1	9	14	0.317466	1								36.5392	1																	0	28.57	7	7	0	12.24	3	3	0	16.73	4	4	245	27.7468	4.77979
4757838	apoptosis regulator BAX isoform beta [Homo sapiens]	48.17	3	1	10	15																												0	29.36	6	7	0	27.52	4	4	0	25.69	3	4	218	24.2044	7.89893
4507149	superoxide dismutase [Cu-Zn] [Homo sapiens]	26.62	1	1	3	5																												0	11.04	1	1	0	22.08	2	3	0	6.49	1	1	154	15.9259	6.12549
62739186	complement factor H isoform a precursor [Homo sapiens]	30.3	1	1	23	29																												0	8.77	8	9	0	22.58	17	17	0	3.82	3	3	1231	138.979	6.62451
32313593	olfactomedin-4 precursor [Homo sapiens]	22.75	1	1	8	11																												0	8.43	3	4	0	7.84	3	3	0	15.1	4	4	510	57.2438	5.69385
27436948	lamin isoform A-delta10 [Homo sapiens]	37.07	4	1	25	46	0.151856	1								10.9141	1								71.8713	1								2.86621	24.13	13	20	0	17.98	10	12	0	21.61	12	14	634	70.6181	8.39697
15147337	E3 ubiquitin-protein ligase UBR5 [Homo sapiens]	34.41	1	1	72	210										24.958	1																	3.16952	21.47	42	76	0	17.51	35	78	0	16.51	30	56	2799	309.158	5.84619
121583483	1-phosphatidylinositol 3-phosphate 5-kinase isoform 2 [Homo sapiens]	35.56	3	1	53	93																												0	12.35	22	29	0	21.02	26	35	0	17.92	20	29	2098	236.986	6.69775
394582079	suppressor of cytokine signaling 2 [Homo sapiens]	53.03	1	1	7	17																												0	42.93	5	7	0	34.85	4	5	0	15.66	2	5	198	22.1583	8.68994
348041314	cathelicidin antimicrobial peptide preproprotein [Homo sapiens]	25.43	1	1	5	8							0.792392	1					20.4373	1		54.0385	1								68.1968	1		0	5.2	1	1	0	25.43	5	5	0	12.14	2	2	173	19.5783	9.40771
194272142	unconventional myosin-IXb isoform 2 [Homo sapiens]	22.45	2	1	40	70	0.145716	1		0.310258	1											51.3399	1											0	13.65	24	31	0	6.68	13	19	0	12.61	16	20	2022	229.001	8.55811
156119615	unconventional myosin-IXa [Homo sapiens]	19.86	1	1	39	67										19.15	1																	0	13.66	23	27	0	9.73	20	26	0	8.01	12	14	2548	292.522	8.88037
119395754	keratin, type II cytoskeletal 5 [Homo sapiens]	40	3	1	26	108	0.479267	1					0.0941575	3	611.091	18.8629	4	107.912	24.3761	1		18.0532	3	78.8319	36.0679	2	50.3264				46.7458	1		2.26346	24.07	13	34	2.09102	31.53	17	48	2.04976	26.1	13	26	590	62.34	7.73779
238814387	zinc finger MYND domain-containing protein 11 isoform b [Homo sapiens]	17.46	7	1	8	24																												0	9.17	6	10	0	4.59	3	8	0	11.82	4	6	567	66.4763	8.63135
156523970	alpha-2-HS-glycoprotein preproprotein [Homo sapiens]	16.08	1	1	4	6													38.0647	1														0	6.27	1	1	0	8.99	3	3	0	9.81	2	2	367	39.3157	5.71924
156104893	arf-GAP with GTPase, ANK repeat and PH domain-containing protein 4 [Homo sapiens]	24.89	1	1	10	31	0.269767	1								41.4763	1																	0	23.38	7	13	0	15.54	6	9	0	15.08	4	9	663	73.0231	7.34229
148747859	rap guanine nucleotide exchange factor 3 isoform a [Homo sapiens]	34.56	1	1	28	57	0.122216	1								2.97148	1								24.3134	1								0	23.19	16	27	0	8.56	7	15	0	17.23	11	15	923	103.586	7.47412
66529407	tensin-1 [Homo sapiens]	22.07	1	1	20	30																												0	3.23	4	7	0	19.02	15	20	0	3.34	3	3	1735	185.586	7.75244
4506265	prostaglandin G/H synthase 2 precursor [Homo sapiens]	23.34	1	1	11	17																												0	9.6	5	6	0	12.75	5	6	0	7.95	4	5	604	68.9517	7.38623
397174762	prospero homeobox protein 1 [Homo sapiens]	30.26	1	1	19	45																												0	21.85	11	18	0	20.22	12	17	0	12.89	6	10	737	83.151	7.18115
170650643	solute carrier family 22 member 23 isoform a [Homo sapiens]	26.97	2	1	12	20																												0	11.52	6	9	0	12.24	6	7	0	11.52	3	4	686	73.6999	7.73779
54112403	chromodomain-helicase-DNA-binding protein 7 [Homo sapiens]	25.43	1	1	49	86																												0	16.25	33	45	0	12.25	19	27	0	6.24	12	14	2997	335.717	6.34131
4507065	antileukoproteinase precursor [Homo sapiens]	36.36	1	1	4	8				0.0655724	1					35.8545	1		32.0357	1														0	28.03	2	2	0	36.36	4	5	0	9.09	1	1	132	14.3159	8.74854
4505621	phosphatidylethanolamine-binding protein 1 preproprotein [Homo sapiens]	18.18	1	1	2	2										40.2903	1																	0	18.18	2	2									187	21.0437	7.53271
261278358	bis(5'-adenosyl)-triphosphatase [Homo sapiens]	33.33	1	1	5	6																												0	9.52	2	2	0	29.25	3	3	0	5.44	1	1	147	16.8476	7.07861
134304848	glutamate receptor 2 isoform 2 precursor [Homo sapiens]	24.12	3	1	15	19																												0	12	7	7	0	17.21	7	7	0	8.49	5	5	883	98.7863	7.75244
15826840	inactive tyrosine-protein kinase 7 isoform a precursor [Homo sapiens]	29.35	5	1	20	31																												0	17.66	10	13	0	12.06	9	9	0	13.64	8	9	1070	118.317	7.09326
4557797	nucleoside diphosphate kinase A isoform b [Homo sapiens]	49.34	5	1	5	6							0.714075	1								84.9628	1											0	9.21	2	2	0	14.47	1	1	0	25.66	2	3	152	17.1377	6.18896
4504151	granulins precursor [Homo sapiens]	22.6	1	1	12	28				0.641013	1								24.057	1								37.5297	1					0	14.17	8	12	0	14.17	8	12	0	8.26	4	4	593	63.4998	6.82959
28395049	mitochondrial inner membrane protein COX18 [Homo sapiens]	11.41	1	1	2	3										87.8431	1																	0	2.7	1	1	0	11.41	2	2					333	37.0388	9.83252
313760624	platelet endothelial cell adhesion molecule precursor [Homo sapiens]	22.36	1	1	15	36																												0	19.24	9	16	0	8.81	7	12	0	9.76	7	8	738	82.4698	6.99072
11342670	azurocidin preproprotein [Homo sapiens]	46.61	1	1	6	9	0.102309	1								3.93248	1								38.4372	1								0	20.32	3	5	0	21.12	2	2	0	15.54	2	2	251	26.8687	9.49561
4505185	macrophage migration inhibitory factor [Homo sapiens]	18.26	1	1	2	5	0.195616	1					0.25682	1		55.5678	1					49.93	2	7.74905										0	18.26	2	2	0	7.83	1	1	3.58447	7.83	1	2	115	12.4682	7.88428
5031635	cofilin-1 [Homo sapiens]	25.3	1	1	3	5	0.186446	1								79.7818	1																	0	4.82	1	1	0	25.3	3	3	0	4.82	1	1	166	18.4907	8.08936
44771211	mediator of RNA polymerase II transcription subunit 13-like [Homo sapiens]	21.09	1	1	28	58																												0	11.63	15	19	0	13.21	13	21	0	6.61	9	18	2210	242.447	6.03662
312283703	malate dehydrogenase, cytoplasmic isoform 3 [Homo sapiens]	33.88	3	1	5	8				0.240278	1								12.6965	1								52.8411	1					0	10.61	2	2	0	26.94	4	5	0	2.86	1	1	245	27.008	9.11475
11067747	cell division cycle 5-like protein [Homo sapiens]	15.84	1	1	11	23							0.447371	1								30.3786	1								67.9046	1		0	10.1	6	10	0	7.23	5	8	0	4.99	5	5	802	92.1937	8.17725
5032311	dystrophin Dp140ab isoform [Homo sapiens]	43.66	5	1	31	62																												0	23.98	16	28	0	19.92	14	16	0	19.67	12	18	1230	141.658	5.8208
7657069	ERO1-like protein alpha precursor [Homo sapiens]	35.9	1	1	13	15																29.3565	1											0	16.24	5	5	0	22.22	7	7	0	7.69	3	3	468	54.3581	5.68115
8393956	serpin B13 [Homo sapiens]	18.93	1	1	7	8							0.213493	1								5.85141	1								27.408	1		0	3.07	1	1	0	15.86	5	6	0	1.79	1	1	391	44.2482	5.70654
20070228	nucleobindin-1 precursor [Homo sapiens]	27.55	1	1	14	31																												0	23.43	9	13	0	17.14	7	10	0	13.67	6	8	461	53.8463	5.24951
13325075	sulfhydryl oxidase 1 isoform a precursor [Homo sapiens]	28.11	2	1	13	35				0.180536	1								32.0023	1														0	9.24	5	13	0	16.87	7	15	0	13.39	6	7	747	82.5255	8.92432
4557485	ceruloplasmin precursor [Homo sapiens]	39.72	1	1	22	35																												0	24.51	11	16	0	21.41	10	11	0	13.05	7	8	1065	122.128	5.71924
24430192	keratin, type I cytoskeletal 16 [Homo sapiens]	39.96	6	1	19	41	0.548256	2	73.8695				0.244688	1		17.2035	2	9.96318	27.3379	2	140.62	43.7877	2	73.8743	52.3657	3	17.2746							2.36685	31.5	12	18	2.00936	21.35	7	10	2.29578	21.35	9	13	473	51.2362	5.04639
4757826	beta-2-microglobulin precursor [Homo sapiens]	18.49	1	1	3	10																												0	5.04	1	1	0	13.45	2	2	0	18.49	3	7	119	13.7059	6.52197
18104982	tyrosine-protein phosphatase non-receptor type 2 isoform 3 [Homo sapiens]	56.94	1	1	15	19																												0	32.01	8	8	0	32.29	6	9	0	14.73	2	2	353	40.9643	6.40479
4885111	calmodulin-like protein 3 [Homo sapiens]	85.23	1	1	13	47																												0	74.5	9	19	0	63.76	8	17	0	59.06	7	11	149	16.88	4.42432
5803225	14-3-3 protein epsilon [Homo sapiens]	42.75	3	1	9	16	0.317466	1								36.5392	1																	0	21.96	5	5	0	27.06	5	6	0	23.92	5	5	255	29.1554	4.7417
4758508	transmembrane protease serine 11D [Homo sapiens]	23.68	1	1	7	13							0.368926	1								42.2036	1											0	16.99	3	5	0	20.33	5	5	0	5.74	2	3	418	46.2344	8.38232
71274148	pleckstrin homology domain-containing family G member 1 [Homo sapiens]	31.05	1	1	29	52																												0	15.88	14	20	0	15.09	13	18	0	15.38	12	14	1385	155.343	6.23975
5453597	F-actin-capping protein subunit alpha-1 [Homo sapiens]	22.03	2	1	4	10										20.4123	1																	0	5.94	2	3	0	18.53	3	3	0	2.45	1	4	286	32.9023	5.69385
4507357	transgelin-2 [Homo sapiens]	56.28	1	1	9	28										13.6946	1																	0	36.18	5	11	0	42.21	6	9	0	23.12	5	8	199	22.3772	8.25049
50659080	alpha-1-antichymotrypsin precursor [Homo sapiens]	38.3	1	1	8	11																												0	19.39	3	4	0	10.17	2	2	0	13	3	5	423	47.6205	5.51611
30410790	tumor suppressor candidate 3 isoform b precursor [Homo sapiens]	21.33	2	1	7	22																												0	11.53	3	6	0	18.44	6	10	0	17.29	4	6	347	39.5326	10.1108
28173554	histone H2B type 3-B [Homo sapiens]	26.19	14	1	4	15																												0	26.19	4	6	0	26.19	3	7	0	17.46	1	2	126	13.8995	10.3159
4501881	actin, alpha skeletal muscle [Homo sapiens]	44.83	9	1	16	38	0.205276	5	150.207	0.134868	3	4.57119	0.0548592	4	214.992	21.4477	5	95.3163	38.6613	7	134.241	22.0327	7	140.56	66.3652	2	65.6946	87.3684	2	10.4363	86.14	1		8.84564	24.14	6	9	4.10422	42.97	11	14	6.40662	25.99	9	15	377	42.0239	5.38916
40806190	TMEM189-UBE2V1 fusion protein [Homo sapiens]	32.97	8	1	8	57	0.477865	1		0.52517	1					12.4588	1		12.2342	1					26.0717	1		23.2958	1					0	21.62	5	26	0	21.62	6	21	0	8.65	3	10	370	42.1824	6.60986
157426875	F-box/LRR-repeat protein 18 [Homo sapiens]	38.16	1	1	17	24																												0	16.3	6	6	0	29.11	10	11	0	19.5	5	7	718	78.8688	8.26514
151101266	TERF1-interacting nuclear factor 2 isoform 1 [Homo sapiens]	23.28	2	1	6	16																												0	16.63	5	10	0	11.75	3	5	0	2.66	1	1	451	49.9917	7.95752
144953913	zinc finger protein 714 [Homo sapiens]	32.07	4	1	16	24																												0	18.02	8	9	0	12.25	7	8	0	13.87	6	7	555	63.9557	9.1001
21361625	exocyst complex component 2 [Homo sapiens]	14.72	1	1	9	11																												0	5.74	4	5	0	11.15	5	5	0	2.16	1	1	924	104	6.90283
5453956	serine/threonine-protein phosphatase 2A 56 kDa regulatory subunit epsilon isoform [Homo sapiens]	34.9	1	1	13	21	0.939839	1								16.5318	1								17.59	1								0	19.91	6	8	0	13.06	5	7	0	13.28	4	6	467	54.6645	6.94678
311893363	calpain-1 catalytic subunit [Homo sapiens]	25.07	1	1	18	47																												0	16.67	11	19	0	13.45	7	16	0	13.45	7	12	714	81.8382	5.66846
21328448	14-3-3 protein beta/alpha [Homo sapiens]	41.46	3	1	8	15	0.317466	1								20.4601	2	104.608																0	35.77	6	8	0	17.89	4	4	0	9.76	3	3	246	28.0648	4.83057
14149760	homeobox protein orthopedia [Homo sapiens]	23.08	1	1	5	5																												0	20.31	3	3	0	3.38	1	1	0	2.77	1	1	325	34.1372	9.46631
17975768	ephrin type-B receptor 3 precursor [Homo sapiens]	39.08	1	1	22	30													16.6892	1														0	27.05	14	16	0	14.83	7	8	0	13.23	6	6	998	110.259	6.31592
4506723	40S ribosomal protein S3a isoform 1 [Homo sapiens]	20.45	1	1	5	25																												0	12.5	3	9	0	10.23	3	10	0	15.53	4	6	264	29.9257	9.72998
219689110	plasminogen activator inhibitor 2 [Homo sapiens]	35.42	1	1	13	20																												0	23.37	7	8	0	16.87	5	6	0	14.46	5	6	415	46.5661	5.63037
41281429	basic leucine zipper and W2 domain-containing protein 1 isoform 4 [Homo sapiens]	16.71	4	1	4	4										20.2705	1																	0	9.35	2	2	0	7.37	2	2					353	40.5128	6.45557
25777612	26S proteasome non-ATPase regulatory subunit 3 [Homo sapiens]	29.21	1	1	11	21																												0	10.86	4	6	0	17.98	6	9	0	15.36	5	6	534	60.9395	8.44092
24308527	stereocilin precursor [Homo sapiens]	11.15	1	1	10	11																												0	5.46	4	4	0	3.15	4	4	0	5.07	3	3	1775	192.844	5.41455
7657683	cystine/glutamate transporter [Homo sapiens]	4.59	1	1	1	10																												0	4.59	1	2	0	4.59	1	6	0	4.59	1	2	501	55.3869	9.18799
5454002	deoxyribonucleoside 5'-monophosphate N-glycosidase isoform 1 [Homo sapiens]	41.38	1	1	5	10										9.65142	1																	0	36.21	4	5	0	18.97	2	2	0	24.14	3	3	174	19.0966	5.04639
77539758	histone H4 [Homo sapiens]	9.71	1	1	1	4				0.16684	1								22.4787	1		32.3755	1											0	9.71	1	1	0	9.71	1	2	1.86386	9.71	1	1	103	11.3604	11.356
4503481	elongation factor 1-gamma [Homo sapiens]	35.7	1	1	9	16																												0	18.76	5	6	0	20.14	5	6	0	11.67	3	4	437	50.0871	6.66846
20336180	proprotein convertase subtilisin/kexin type 6 isoform b preproprotein [Homo sapiens]	37.76	8	1	25	67																												0	26.88	15	29	0	22.8	13	28	0	12.45	5	10	956	105.053	7.6792
297632406	interleukin-24 isoform 5 [Homo sapiens]	58.73	1	1	2	8																												0	58.73	2	4	0	17.46	1	2	0	17.46	1	2	63	7.34255	10.4038
291575128	L-lactate dehydrogenase B chain [Homo sapiens]	27.25	1	1	6	9				0.515332	1					21.1217	2	107.484	41.0882	1								79.7316	1					0	5.09	2	3	0	4.49	2	2	0	22.16	4	4	334	36.6151	6.04932
40255260	PTB-containing, cubilin and LRP1-interacting protein isoform 1 [Homo sapiens]	20.97	2	1	5	11				0.0368514	1								9.12186	1		71.0916	1											0	6.05	1	1	0	16.94	4	6	0	12.9	3	4	248	28.1028	6.46826
23238211	actin-related protein 2/3 complex subunit 2 [Homo sapiens]	23.33	1	1	6	10	0.336729	1								14.2518	1					88.8252	1		42.3242	1								0	16.33	3	3	0	15.33	4	4	0	12	3	3	300	34.3115	7.35693
260436922	suprabasin isoform 1 precursor [Homo sapiens]	21.02	3	1	6	14	0.165461	1		0.141329	1		0.190379	1		25.2889	1		10.4387	1		18.8354	1					73.861	1		98.9365	1		3.04679	11.69	3	4	3.14957	17.8	4	5	3.69158	19.15	4	5	590	60.5046	7.00537
148886760	nanos homolog 3 [Homo sapiens]	35.94	1	1	6	9																												0	26.04	4	5	0	15.63	2	2	0	11.98	2	2	192	20.7153	8.73389
311771694	ARPC4-TTLL3 fusion protein [Homo sapiens]	26.88	4	1	14	27										49.3329	1																	0	8.8	6	15	0	10.24	4	6	0	19.04	6	6	625	71.6729	5.88428
237757361	ceramide kinase-like protein isoform 7 [Homo sapiens]	26.65	5	1	10	17																												0	12.65	4	6	0	19.65	8	9	0	4.86	2	2	514	57.5955	7.79639
167466252	transmembrane protease serine 11A isoform 2 [Homo sapiens]	39.47	2	1	10	15	0.534131	1																										0	19.62	5	6	0	12.92	3	4	0	21.29	4	5	418	47.1963	9.15869
226443152	abhydrolase domain-containing protein 14B isoform 1 [Homo sapiens]	42.38	1	1	6	10																												2.13735	42.38	6	7	0	10.48	1	1	0	10.48	2	2	210	22.3316	6.40479
194328762	dnaJ homolog subfamily A member 4 isoform 3 [Homo sapiens]	17.84	3	1	7	19										58.3741	1																	0	17.84	6	11	0	15.95	5	6	0	10.27	2	2	370	41.5703	7.1665
153792804	uncharacterized protein LOC286238 [Homo sapiens]	79.46	1	1	7	16																												0	40.18	4	7	0	67.86	5	7	0	25	1	2	112	12.9325	9.34912
122937259	solute carrier family 45 member 4 [Homo sapiens]	26.69	1	1	13	27	0.543143	1								15.3598	1								28.2794	1								0	11.03	5	7	0	22.81	11	13	0	6.77	4	7	798	87.5705	6.99072
116284402	zinc finger protein 682 isoform 2 [Homo sapiens]	26.39	2	1	11	30																												0	12.66	6	8	0	12.02	7	14	0	11.8	4	8	466	54.4099	9.1001
46255030	protein FAM3B isoform a precursor [Homo sapiens]	48.09	2	1	7	19							0.173749	1								23.1671	1											0	34.47	4	7	0	17.87	4	5	0	21.28	5	7	235	25.9652	8.74854
42794612	myeloma-overexpressed gene protein [Homo sapiens]	43.77	1	1	14	20																												0	16.61	4	4	0	31.95	7	7	0	36.1	8	9	313	33.5341	8.79248
62632750	probable phospholipid-transporting ATPase IF [Homo sapiens]	26	1	1	25	39																												0	9.52	8	8	0	13.68	12	14	0	16.06	13	17	1177	134.104	6.96143
46309849	UPF0471 protein C1orf63 [Homo sapiens]	38.28	1	1	13	27																83.2848	1											1.68837	22.07	6	8	0	25.17	7	9	0	22.76	6	10	290	33.5933	11.7661
36029914	deubiquitinating protein VCIP135 [Homo sapiens]	29.38	1	1	24	52													26.1193	1														0	19.89	12	18	0	11.78	11	21	0	15.22	11	13	1222	134.236	7.1958
22035616	oxysterol-binding protein-related protein 7 [Homo sapiens]	31.95	1	1	26	74				0.142202	1								23.2202	1														0	13.54	11	21	0	28.03	19	33	0	16.51	13	20	842	95.3717	8.04541
21729873	ATP-binding cassette sub-family C member 11 isoform a [Homo sapiens]	13.68	1	1	13	22																												0	3.84	4	6	0	10.35	6	11	0	4.05	5	5	1382	154.202	8.08936
21450753	spermatogenesis-associated serine-rich protein 1 [Homo sapiens]	51	1	1	10	12																												0	30	4	5	0	35.67	5	5	0	7	2	2	300	33.6836	7.45947
13375695	probable cysteine--tRNA ligase, mitochondrial [Homo sapiens]	18.44	1	1	7	8																												0	10.64	4	4	0	4.26	2	2	0	6.74	2	2	564	62.1847	8.33838
7705949	palmitoyltransferase ZDHHC2 [Homo sapiens]	35.42	1	1	11	20																												0	22.89	6	6	0	22.07	7	10	0	7.9	3	4	367	41.9937	8.35303
7705935	zinc finger protein 639 [Homo sapiens]	31.34	1	1	14	19																												0	17.94	7	7	0	14.85	5	5	0	13.61	5	7	485	56.0183	5.56689
7705558	inositol-3-phosphate synthase 1 isoform 1 [Homo sapiens]	33.33	3	1	8	14																												0	18.1	3	5	0	23.12	6	8	0	1.97	1	1	558	61.0291	5.75732
21314671	transient receptor potential cation channel subfamily M member 4 isoform 1 [Homo sapiens]	31.3	2	1	32	61													47.6696	1														0	15.32	12	16	0	25.7	22	29	0	15.9	11	16	1214	134.215	8.14795
20149675	EF-hand domain-containing protein D2 [Homo sapiens]	41.67	1	1	8	14																												0	4.17	1	1	0	37.08	5	6	0	35	4	7	240	26.6805	5.19873
7657092	interleukin-36 alpha [Homo sapiens]	24.05	1	1	3	4										12.9049	1																	0	15.19	2	3					0	8.86	1	1	158	17.673	6.30322
93102361	palladin isoform 2 [Homo sapiens]	20.98	4	1	16	61																												0	13.11	9	18	0	12.75	8	20	0	13.56	9	23	1106	121.971	6.91748
21071074	Krueppel-like factor 12 [Homo sapiens]	38.06	1	1	13	25				0.39357	1								21.0797	1								53.5603	1					0	24.13	8	12	0	15.17	4	8	0	18.16	5	5	402	44.2122	9.70068
5729962	submaxillary gland androgen-regulated protein 3B precursor [Homo sapiens]	65.82	1	1	2	4										13.7637	1		3.53349	1														0	26.58	1	1	0	65.82	2	3					79	8.18226	9.56885
31317309	phosphatidylinositol 4-phosphate 5-kinase type-1 gamma isoform 2 [Homo sapiens]	33.38	2	1	13	21																												0	21.86	7	9	0	20.06	7	8	0	10.63	4	4	668	73.2145	5.2876
154800441	proline-rich protein HaeIII subfamily 1 precursor [Homo sapiens]	26.51	2	1	1	9																												12.389	26.51	1	3	3.20516	26.51	1	4	2.89365	26.51	1	2	166	17.0053	4.95752
47132620	keratin, type II cytoskeletal 2 epidermal [Homo sapiens]	46.48	2	1	22	37										58.2384	1					34.9149	1		49.6939	1								0	29.73	13	16	2.09102	19.87	7	11	0	22.85	9	10	639	65.3932	8.00146
29244926	atrial natriuretic peptide-converting enzyme [Homo sapiens]	20.63	1	1	16	24																												0	11.32	8	9	0	14.88	10	12	0	2.59	2	3	1042	116.409	5.021
5031953	dol-P-Man:Man(5)GlcNAc(2)-PP-Dol alpha-1,3-mannosyltransferase isoform a [Homo sapiens]	17.12	1	1	6	14																												0	12.79	4	6	0	9.59	4	5	0	4.34	2	3	438	50.0935	9.43701
4827036	peptidoglycan recognition protein 1 precursor [Homo sapiens]	40.31	1	1	6	18										45.2544	1																	0	40.31	5	8	0	27.04	3	7	0	18.88	2	3	196	21.7167	8.5874
4506953	alpha-N-acetylneuraminide alpha-2,8-sialyltransferase [Homo sapiens]	36.8	1	1	12	26																												0	30.34	8	12	0	22.47	7	9	0	23.31	5	5	356	40.4923	9.29053
117306167	basic salivary proline-rich protein 3 precursor [Homo sapiens]	3.24	1	1	1	4				2.63722	1		4.94346	1								19.5251	1					91.3424	1		3.94969	1		0	3.24	1	1	0	3.24	1	2	2.04462	3.24	1	1	309	30.9717	10.7993
30581141	proteasome activator complex subunit 1 isoform 2 [Homo sapiens]	31.2	2	1	6	6										24.6134	1																	0	18.4	3	3	0	3.2	1	1	0	11.6	2	2	250	28.5839	6.7124
5231228	ribonuclease T2 precursor [Homo sapiens]	33.59	1	1	10	13																												0	16.8	4	4	0	22.66	5	5	0	16.8	4	4	256	29.4618	7.07861
4758426	guanine deaminase isoform b [Homo sapiens]	24.01	3	1	8	10																												0	10.35	3	3	0	18.72	5	5	0	8.15	2	2	454	50.9706	5.68115
4505227	myeloid cell nuclear differentiation antigen [Homo sapiens]	13.02	1	1	4	6							0.0488827	1								13.7874	1											0	1.72	1	1	0	6.63	2	2	0	7.86	3	3	407	45.8072	9.75928
22165431	annexin A11 [Homo sapiens]	21.19	1	1	10	16																												0	12.08	5	6	0	12.08	5	6	0	11.49	3	4	505	54.3551	7.6499
10280622	alpha-amylase 2B precursor [Homo sapiens]	84.74	1	1	42	666	0.213272	83	107.267	0.250137	69	64.4203	0.235112	49	78.9497	28.6352	129	83.3146	28.5633	133	66.0477	24.9299	93	84.1291	52.0791	27	38.5529	57.5526	32	69.5664	58.515	28	58.7891	261.066	72.41	33	216	332.805	63.01	30	259	273.12	75.93	28	191	511	57.673	7.09326
4504529	histatin-1 precursor [Homo sapiens]	28.07	1	1	1	5																												0	28.07	1	3	0	28.07	1	2					57	6.95838	9.12939
4885063	fructose-bisphosphate aldolase C [Homo sapiens]	28.3	2	1	6	10										35.7679	1		21.5649	1		79.3846	1											0	17.31	3	3	2.25307	19.23	3	3	0	15.11	4	4	364	39.4312	6.87354
4503009	carboxypeptidase E preproprotein [Homo sapiens]	48.95	1	1	13	16										9.5438	1																	0	28.15	7	8	0	16.6	4	4	0	24.79	4	4	476	53.1171	5.13525
119874201	protein furry homolog-like [Homo sapiens]	23.66	1	1	58	96																												0	11.52	22	32	0	14.27	32	38	0	8.16	20	26	3013	339.383	5.57959
24638446	histone H2A type 2-C [Homo sapiens]	48.84	8	1	7	15	0.182076	1		0.0665446	1		0.21431	1		10.4247	1		9.75954	3	44.652	11.3373	1		57.2544	1					52.9014	1		2.03632	19.38	3	4	0	44.19	4	7	2.25519	17.05	3	4	129	13.9798	10.9019
10140845	ephrin type-A receptor 8 isoform 1 precursor [Homo sapiens]	33.93	1	1	27	60																												0	21.29	15	23	0	14.73	11	20	0	18.71	13	17	1005	110.932	8.06006
46243671	probable G-protein coupled receptor 152 [Homo sapiens]	8.3	1	1	4	25																									1.92319	1		0	4.68	2	9	0	4.68	2	4	0	8.3	4	12	470	50.9296	4.7417
41393575	glycerol kinase 2 [Homo sapiens]	29.29	1	1	10	21	0.634009	1								1.35603	1								2.13882	1								0	13.92	5	10	0	16.46	5	6	0	6.69	3	5	553	60.5547	5.77002
15617199	histone H2A type 3 [Homo sapiens]	66.15	16	1	8	20	0.182076	1		0.0665446	1		0.21431	1		10.4247	1		11.2688	2	21.5638	11.3373	1		57.2544	1					52.9014	1		2.03632	46.15	5	7	2.50195	56.92	4	7	2.25519	56.92	5	6	130	14.1129	11.0483
52317263	olfactory receptor 4N2 [Homo sapiens]	22.15	1	1	2	19										12.2223	1																	2.42114	9.12	1	9	2.5479	22.15	2	8	0	9.12	1	2	307	34.6976	8.79248
52353943	olfactory receptor 6C1 [Homo sapiens]	15.06	1	1	3	3																												0	4.17	2	2					0	10.9	1	1	312	35.6357	8.82178
4885165	cystatin-A [Homo sapiens]	12.24	1	1	1	1				0.397932	1								66.2003	1																		0	12.24	1	1					98	10.9997	5.50342
212276049	protein FAM25G [Homo sapiens]	23.6	1	1	2	2																																0	23.6	2	2					89	9.31389	6.15088
																																			21.9139				22.5455				17.9114
																																							20.7903	2.51309
